# Supplementary material for: SARS-COV-2 breakthrough infection and its covariates among healthcare providers of a hospital in Bangladesh during the omicron wave
Source: PubMed Central journal article supplement (PMC11409073; doi:10.1016/j.heliyon.2024.e37287), 2024-09-02
Supplement: mmc1.pdf [file mmc1.pdf]

**SARS-COV-2 BREAKTHROUGH INFECTION AND ITS COVARIATES AMONG HEALTHCARE PROVIDERS OF A HOSPITAL IN BANGLADESH DURING THE OMICRON WAVE**

Place of the study: Narayanganj 300 Bed Hospital, Narayanganj/

তথ্য সংগ্রহের স্থান : নারায়নগঞ্জ ৩০০ শয্যা বিশিষ্ট হাসপাতাল, নারায়নগঞ্জ

Data collection Date/

Data collector's name/

Code of the study subject/

তথ্য সংগ্রহের তারিখ :

তথ্য সংগ্রহকারীর নাম :

তথ্য প্রদানকারীর কোড নম্বর :

**(A) General information of the study subject /তথ্য প্রদানকারীর সাধারণ তথ্যাদি :**

Name/ নাম:

Age / বয়স:

Gender / পুরুষ / মহিলা:

Contact number/ ফোন নাম্বার:

Alternative contact number / বিকল্প ফোন নাম্বার:

E-mail/ ই-মেইল:

Designation/ পদবী :

**(B) Clinical and anthropometric information / ক্লিনিক্যাল ও এন্থ্রোপোমেট্রিক তথ্যাদি:**

Weight (Kg)/

Height(cm)/

BMI(kg/m<sup>2</sup>)/

ওজন:

উচ্চতা:

বিএমআই :

Waist (cm):

Hip (cm):

Waist-Hip ratio

ওয়েস্ট :

হিপ :

ওয়েস্ট-হিপ রেশিও :

1. Do you have any chronic diseases/আপনার কি কোন পুরাতন/দীর্ঘস্থায়ী রোগ আছে?

a) yes /হ্যাঁ b) no/ না c) don't know/ জানা নেই

2. If the answer is yes, which of the following diseases?/ উত্তর হ্যাঁ হলে, কোন রোগটি ছিল?

a) Diabetes/ ডায়াবেটিস; b) Hypertension /উচ্চ রক্তচাপ; c) COPD/ শ্বাসকষ্ট জনিত রোগ ; d) Renal diseases/ কিডনী জনিত রোগ; e) Cancer/ ক্যান্সার ; f) Asthma/ অ্যাজমা; g) Others/ অন্যান্য

**(C) Information of the study subjects from March, 2020 to November, 2021/ মার্চ ২০২০ থেকে নভেম্বর ২০২১ পর্যন্ত তথ্যাদি :**

3. Did you suffer from COVID symptoms anytime?/ এ সময়ের মধ্যে কি কোভিড এর উপসর্গ দেখা দিয়েছে?

a) yes / হ্যাঁ      b) no / না

4. If yes, select from the followings/ উত্তর হ্যাঁ হলে, কী কী উপসর্গ ছিল?

a) Fever/ জ্বর ; b) Cough/ কাশি; c) Short breathing/ শ্বাস কষ্ট ; d) Throat ache/ গলা ব্যথা; e) Muscle pain/ শরীর ব্যথা; f) Diarrhea/ ডায়রিয়া; g) Head ache/ মাথা ব্যথা; h) No taste and smell/ স্বাদ ও গন্ধ না পাওয়া ; i) Conjunctivitis /চোখ গুঠা ; j) Fingers getting colorless/ হাত বা পায়ের আঙুল বর্ণহীন হয়ে যাওয়া; k) Others/ অন্যান্য

5. Did you have any test for COVID? / কোভিড নির্ণয়ের পরীক্ষা করেছিলেন কি?

a) yes/ হ্যাঁ      b) no/ না

6. If yes, which test from the list?/ উত্তর হ্যাঁ হলে, কী পরীক্ষা করেছেন ?

a) rtPCR/ আরটিপিসিআর      b)Antigen/ অ্যান্টিজেন

7. Was the report positive ?/ রিপোর্ট কি পজেটিভ হয়েছিল

a)Yes /হ্যাঁ      b) no /না

8. Whether any need for hospitalization/ কোভিড আক্রান্ত হওয়ার পর কি হাসপাতালে ভর্তির প্রয়োজন হয়েছিল?

a)Yes / হ্যাঁ      b) no / না

9. Whether any need for oxygen supplimentation কোভিড আক্রান্ত হওয়ার পরে কি অক্সিজেন দেওয়ার প্রয়োজন হয়েছিল?

a)Yes / হ্যাঁ      b) no / না

10. Whether any need for ICU support?/কোভিড আক্রান্ত হওয়ার পর কি আইসিইউ তে ভর্তির প্রয়োজন হয়েছিল?

a)Yes / হ্যাঁ      b) no / না

**(D) Information after 30 Nov, 2021/ ৩০ নভেম্বর, ২০২১ পরবর্তী তথ্যসমূহ :**

11. Did you get/have any symptom of COVID for the last 3 months?/গত ৩ মাসে কি কোভিড এর উপসর্গ দেখা দিয়েছে?

a) Yes / হ্যাঁ      b) no / না

12. If yes, select from the followings/ উত্তর হ্যাঁ হলে, কী কী উপসর্গ ছিল?

a) Fever/ জ্বর ; b) Cough/ কাশি; c) Short breathing/ শ্বাস কষ্ট ; d) Throat ache/ গলা ব্যথা; e) Muscle pain/ শরীর ব্যথা; f) Diarrhea/ ডায়রিয়া; g) Head ache/ মাথা ব্যথা; h) No taste and smell/ স্বাদ ও গন্ধ না পাওয়া ;i) Conjunctivitis /চোখ গুঠা ; j) Fingers getting colorless/ হাত বা পায়ের আঙুল বর্ণহীন হয়ে যাওয়া; k) Others/ অন্যান্য

13. Did you have any test for COVID?/ কোভিড নির্ণয়ের পরীক্ষা করেছিলেন কি?

a) yes/ হ্যাঁ b) no/ না

14. If yes, which test from the list?/ উত্তর হ্যাঁ হলে, কী পরীক্ষা করেছেন ?

a) rtPCR/ আরটিপিসিআর b)Antigen/ অ্যান্টিজেন

15. Was the report positive ?/ রিপোর্ট কি পজেটিভ হয়েছিল?

a)Yes /হ্যাঁ b) no /না

16.Whether any need for hospitalization/ কোভিড আক্রান্ত হওয়ার পর কি হাসপাতালে ভর্তি প্রয়োজন হয়েছিল?

a)yes / হ্যাঁ b) no / না

17. Whether any need for oxygen supplementation কোভিড আক্রান্ত হওয়ার পরে কি অক্সিজেন দেওয়ার প্রয়োজন হয়েছিল?

a)yes / হ্যাঁ b) no / না

18. Whether any need for ICU support?/কোভিড আক্রান্ত হওয়ার পর কি আইসিইউ তে ভর্তি প্রয়োজন হয়েছিল?

a) yes / হ্যাঁ b) no / না

19. Vaccination related information /ভ্যাক্সিনেশন সংক্রান্ত তথ্যসমূহ :

20. Did you get vaccine? / আপনি কি ভ্যাক্সিন নিয়েছেন?

a) yes/ হ্যাঁ b)no/ না

21. If the Answer is yes, please give the related information below/ উত্তর হ্যাঁ হলে,ভ্যাক্সিন গ্রহণ সম্পর্কিত তথ্য :

| Doses/ ডোজ সংখ্যা | Vaccination date/ গ্রহণের তারিখ | Name of the manufacturer/ ভ্যাক্সিন প্রস্তুতকারী প্রতিষ্ঠান এর নাম |
|-------------------|---------------------------------|--------------------------------------------------------------------|
| 1                 |                                 |                                                                    |
| 2                 |                                 |                                                                    |
| 3                 |                                 |                                                                    |
